# Supplementary material for: Efficacy of silk fibroin biomaterial vehicle for in vivo mucosal delivery of Griffithsin and protection against HIV and SHIV infection ex vivo
Source: PubMed Central journal article supplement (PMC7569169; doi:10.1002/jia2.25628), 2020-10-18

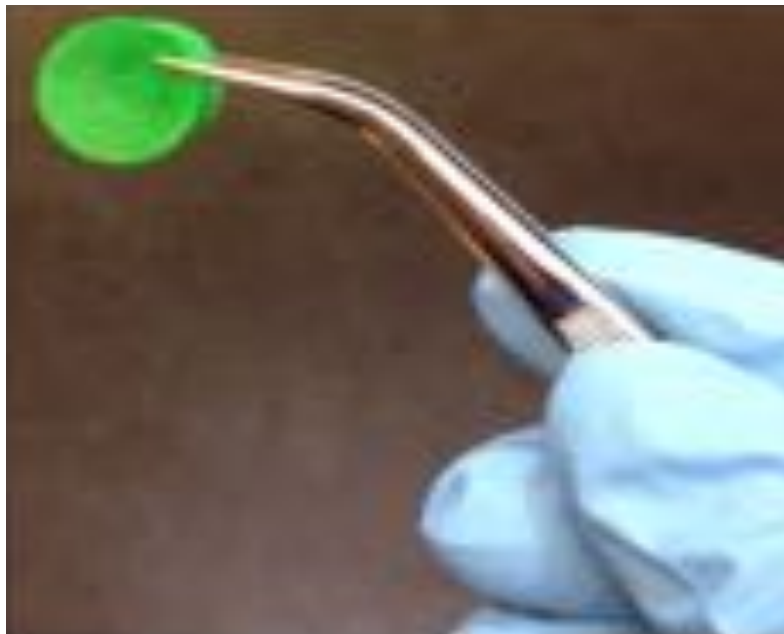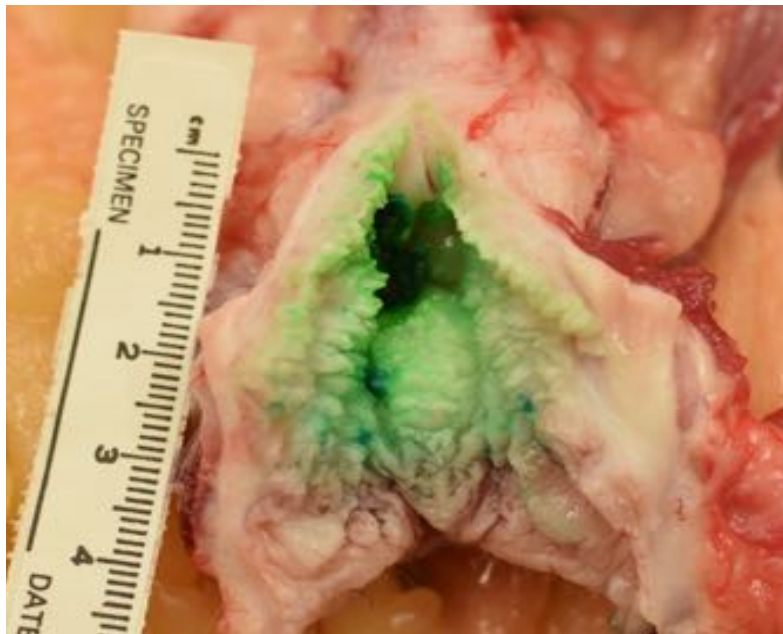

Supplement: JIA2-23-e25628-s001.pdf [file JIA2-23-e25628-s001.pdf]
