# Supplementary material for: Efficacy of silk fibroin biomaterial vehicle for in vivo mucosal delivery of Griffithsin and protection against HIV and SHIV infection ex vivo
Source: PubMed Central journal article supplement (PMC7569169; doi:10.1002/jia2.25628), 2020-10-18
Supplement: JIA2-23-e25628-s003.pdf [file JIA2-23-e25628-s003.pdf]

**Time**

|           | Df | Sum Sq   | Mean Sq  | F value | Pr(>F) |
|-----------|----|----------|----------|---------|--------|
| Groups    | 1  | 0.012751 | 0.012751 | 0.7987  | 0.3866 |
| Residuals | 14 | 0.223511 | 0.015965 |         |        |

**Treatment**

|           | Df | Sum Sq   | Mean Sq   | F value | Pr(>F) |
|-----------|----|----------|-----------|---------|--------|
| Groups    | 2  | 0.000217 | 0.0001086 | 0.0072  | 0.9928 |
| Residuals | 13 | 0.195612 | 0.0150471 |         |        |

**Time x Site**

|           | Df | Sum Sq   | Mean Sq  | F value | Pr(>F) |
|-----------|----|----------|----------|---------|--------|
| Groups    | 1  | 0.012751 | 0.012751 | 0.7987  | 0.3866 |
| Residuals | 14 | 0.223511 | 0.015965 |         |        |

**Time x Treatment**

|           | Df | Sum Sq   | Mean Sq   | F value | Pr(>F) |
|-----------|----|----------|-----------|---------|--------|
| Groups    | 4  | 0.008822 | 0.0022055 | 0.1656  | 0.9515 |
| Residuals | 11 | 0.146536 | 0.0133215 |         |        |

**Site x Treatment**

|           | Df | Sum Sq   | Mean Sq   | F value | Pr(>F) |
|-----------|----|----------|-----------|---------|--------|
| Groups    | 2  | 0.000217 | 0.0001086 | 0.0072  | 0.9928 |
| Residuals | 13 | 0.195612 | 0.0150471 |         |        |

**Time x Site x Treatment**

|           | Df | Sum Sq   | Mean Sq   | F value | Pr(>F) |
|-----------|----|----------|-----------|---------|--------|
| Groups    | 4  | 0.008822 | 0.0022055 | 0.1656  | 0.9515 |
| Residuals | 11 | 0.146536 | 0.0133215 |         |        |
