# Supplementary material for: Efficacy of silk fibroin biomaterial vehicle for in vivo mucosal delivery of Griffithsin and protection against HIV and SHIV infection ex vivo
Source: PubMed Central journal article supplement (PMC7569169; doi:10.1002/jia2.25628), 2020-10-18
Supplement: JIA2-23-e25628-s004.pdf [file JIA2-23-e25628-s004.pdf]

| SF % (w/v) | Grft (mg/mL) | Dye <sup>a</sup> | Dissolution, <i>in vitro</i> (time) <sup>b</sup> | Compartment | Dissolution, <i>in vivo</i> <sup>c</sup> | Notes                    |
|------------|--------------|------------------|--------------------------------------------------|-------------|------------------------------------------|--------------------------|
| 1          | –            | –                | < 10 seconds                                     | Vaginal     | Could not be placed, stuck to forceps    |                          |
| 2.5        | –            | FD&C green       | < 10 seconds                                     | Vaginal     | Complete; facile placement               |                          |
|            | –            | FD&C green       |                                                  | Rectal      | Partial*; facile placement               | *Feces present in rectum |
| 2.5        | 1            | –                | < 30 seconds                                     | Vaginal     | Complete; facile placement               |                          |
| 3          | –            | FD&C green       | < 20 seconds                                     | –           | –                                        |                          |
| 6          | –            | –                | < 20 minutes                                     | Vaginal     | Incomplete; facile placement             |                          |
|            |              |                  |                                                  | Rectal      | Incomplete; facile placement             |                          |

<sup>a</sup>Dye added at 1% (v/v) to the SF solution prior to freezing and lyophilization

<sup>b</sup>Dissolution in a beaker of water (10 mLs)

<sup>c</sup>Degree of disc dissolution after 1 hour placement in recumbent and sedated macaque
